# Supplementary material
Source: Springer Nature journal article supplement (https://www.springermedizin.de/resource/supplementary/12875_2013_1053_MOESM1_ESM.pdf/9436030)

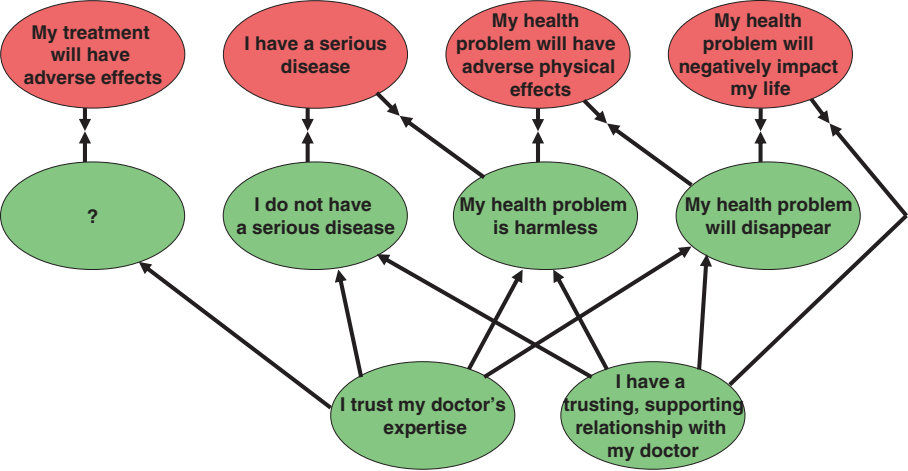

 Worrying core cognition

 Reassuring core cognition

 Counterbalances

 Supports

Supplement: MOESM1 [file 9436030]
